# Supplementary material for: Development of 3D Printed Biodegradable Mesh with Antimicrobial Properties for Pelvic Organ Prolapse
Source: MDPI journal article supplement (doi:10.3390/polym14040763), 2022-02-16
Supplement: s1 [file s1]

Article

# Development of 3D Printed Biodegradable Mesh with Antimicrobial Properties for Pelvic Organ Prolapse

Jiongyu Ren <sup>1,2</sup>, Rebecca Murray <sup>3,4,5</sup>, Cynthia S. Wong <sup>6</sup>, Jilong Qin <sup>7</sup>, Michael Chen <sup>1,2,3</sup>, Makrina Totsika <sup>7</sup>, Andrew D. Riddell <sup>5,8</sup>, Andrea Warwick <sup>5</sup>, Nicholas Rukin <sup>3,5</sup> and Maria A. Woodruff <sup>1,2,\*</sup>

<sup>1</sup> Centre for Biomedical Technologies, Queensland University of Technology (QUT), Brisbane, QLD 4000, Australia; edward.ren@qut.edu.au (J.R.); m66.chen@hdr.qut.edu.au (M.C.)

<sup>2</sup> School of Mechanical, Medical and Process Engineering, Queensland University of Technology (QUT), Brisbane, QLD 4000, Australia

<sup>3</sup> Herston Biofabrication Institute, Metro North Health, Brisbane, QLD 4029, Australia; becca.murray@health.qld.gov.au (R.M.); nicholas.rukin@health.qld.gov.au (N.R.)

<sup>4</sup> Australian Institute for Bioengineering and Nanotechnology, The University of Queensland, Brisbane, QLD 4072, Australia

<sup>5</sup> Redcliffe Hospital, Metro North Health, Redcliffe, QLD 4020, Australia; adriddell@hotmail.com (A.D.R.); mda99amw@yahoo.com (A.W.)

<sup>6</sup> Aikenhead Centre for Medical Discovery (ACMD), St Vincent's Hospital, Melbourne, VIC 3065, Australia; c\_wong32@hotmail.com

<sup>7</sup> Centre for Immunology and Infection Control, School of Biomedical Sciences, Queensland University of Technology, Brisbane, QLD 4000, Australia; jilong.qin@qut.edu.au (J.Q.); makrina.totsika@qut.edu.au (M.T.)

<sup>8</sup> Northside Clinical Unit, School of Clinical Medicine, The University of Queensland, Brisbane, QLD 4072, Australia

\* Correspondence: mia.woodruff@qut.edu.au

**Citation:** Ren, J.; Murray, R.; Wong, C.S.; Qin, J.; Chen, M.; Totsika, M.; Riddell, A.D.; Warwick, A.; Rukin, N.; Woodruff, M.A. Development of 3D Printed Biodegradable Mesh with Antimicrobial Properties for Pelvic Organ Prolapse. *Polymers* **2022**, *14*, 763. <https://doi.org/10.3390/polym14040763>

Academic Editor: Matthew Blacklock

Received: 28 December 2021

Accepted: 3 February 2022

Published: 16 February 2022

**Publisher's Note:** MDPI stays neutral with regard to jurisdictional claims in published maps and institutional affiliations.

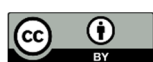

**Copyright:** © 2022 by the authors. Submitted for possible open access publication under the terms and conditions of the Creative Commons Attribution (CC BY) license (<https://creativecommons.org/licenses/by/4.0/>).

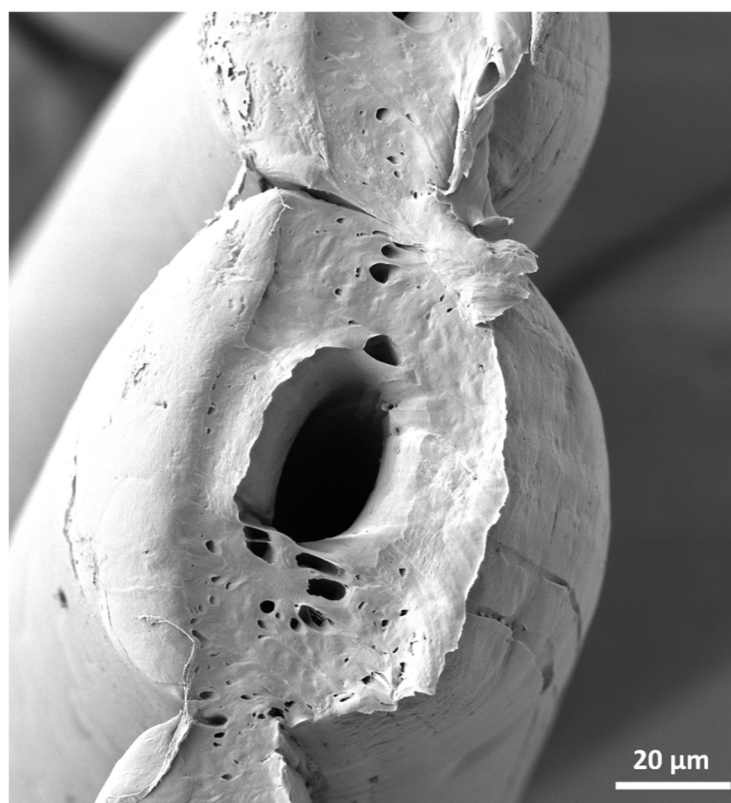

**Figure S1.** Cross sectional SEM image of a representative sample from the 75:25 degraded group (after 28 days immersion in PBS), showing the formation of a hollow structure after the PEG content was dissolved in PBS solution, indicating the PEG component of the composite might have been more central when manufactured via MEW.
